# Supplementary material for: Psychiatric Disorders From Childhood to Adulthood in 22q11.2 Deletion Syndrome: Results From the International Consortium on Brain and Behavior in 22q11.2 Deletion Syndrome
Source: Atypon-hosted journal article supplement (doi:10.1176/appi.ajp.2013.13070864), 2014-02-28
Supplement: 627_ds001.pdf [file 627_ds001.pdf]

**Table S1:** Psychiatric diagnoses assessed in each cohort

|                                         | TOR           | CAR/DU      | SYR           | PHL | GVA         | UCHT | TA | MST                     | DRM | LA           | RO | LDN | ATL | NCS | DVS | TOT         |
|-----------------------------------------|---------------|-------------|---------------|-----|-------------|------|----|-------------------------|-----|--------------|----|-----|-----|-----|-----|-------------|
| Schizophrenia                           | Y             | Y           | Y             | Y   | Y           | Y    | Y  | Y<br>(Mini PAS-<br>ADD) | Y   | Y            | Y  | Y   | Y   | Y   | Y   | <b>1327</b> |
| Schizoaffective<br>Disorder             | Y             | Y           | Y             | Y   | Y           | Y    | Y  | Y<br>(Mini PAS-<br>ADD) | Y   | Y            | Y  | Y   | Y   | Y   | Y   | <b>1327</b> |
| Schizophreniform<br>Disorder            | Y             | Y<br>(SCAN) | Y             | Y   | Y           | Y    | Y  | N                       | N   | Y<br>(SCID)  | Y  | N   | Y   | Y   | Y   | <b>1049</b> |
| Brief Psychotic<br>Disorder             | Y             | Y<br>(SCAN) | Y             | Y   | Y           | Y    | Y  | Y<br>(Mini PAS-<br>ADD) | N   | Y<br>(SCID)  | Y  | N   | Y   | Y   | Y   | <b>1073</b> |
| Psychotic<br>Disorder (other<br>or NOS) | Y             | Y           | Y             | Y   | Y           | Y    | Y  | Y                       | Y   | Y            | Y  | Y   | Y   | Y   | Y   | <b>1402</b> |
| Separation<br>Anxiety Disorder          | Y<br>(K-SADS) | Y<br>(CAPA) | Y<br>(K-SADS) | Y   | Y<br>(DICA) | N    | Y  | N                       | Y   | Y<br>(CDISC) | Y  | Y   | Y   | Y   | Y   | <b>815</b>  |
| Specific Phobia                         | Y             | Y           | Y             | Y   | Y           | N    | Y  | Y<br>(Mini PAS-<br>ADD) | Y   | Y            | Y  | Y   | Y   | Y   | Y   | <b>1215</b> |

|                                    |   |   |   |   |             |   |   |             |   |             |   |   |   |   |   |      |
|------------------------------------|---|---|---|---|-------------|---|---|-------------|---|-------------|---|---|---|---|---|------|
|                                    |   |   |   |   |             |   |   | ADD)        |   |             |   |   |   |   |   |      |
| Social Phobia                      | Y | Y | Y | Y | Y           | N | Y | Y           | Y | Y           | Y | Y | Y | Y | Y | 1292 |
| Panic Disorder                     | Y | Y | Y | N | Y<br>(SCID) | N | Y | Y           | Y | Y           | Y | Y | Y | Y | Y | 1089 |
| Agoraphobia                        | Y | Y | Y | N | Y<br>(SCID) | N | Y | Y           | Y | Y           | Y | Y | Y | Y | Y | 1089 |
| PTSD                               | Y | N | Y | N | Y           | N | Y | Y<br>(MINI) | Y | Y           | Y | N | Y | Y | Y | 918  |
| OCD                                | Y | Y | Y | Y | Y           | N | Y | Y           | Y | Y           | Y | Y | Y | Y | Y | 1292 |
| GAD                                | Y | Y | Y | Y | Y           | N | Y | Y           | Y | Y           | Y | Y | Y | Y | Y | 1291 |
| Anxiety Disorder<br>(other or NOS) | Y | Y | Y | Y | Y           | Y | Y | Y           | Y | Y           | Y | Y | Y | Y | Y | 1402 |
| Major Depressive<br>Disorder       | Y | Y | Y | Y | Y           | Y | Y | Y           | Y | Y           | Y | Y | Y | Y | Y | 1402 |
| Dysthymia                          | Y | Y | Y | Y | Y           | Y | Y | Y<br>(MINI) | Y | Y           | Y | Y | Y | Y | Y | 1377 |
| Mood Disorder<br>(other or NOS)    | Y | Y | Y | Y | Y           | Y | Y | Y           | Y | Y           | Y | Y | Y | Y | Y | 1402 |
| Bipolar Disorder /<br>(Hypo)manic  | Y | Y | Y | Y | Y           | Y | Y | Y           | N | Y<br>(SCID) | Y | Y | Y | Y | Y | 1232 |

|                         |               |             |               |   |             |   |   |                         |   |              |   |   |   |   |   |             |
|-------------------------|---------------|-------------|---------------|---|-------------|---|---|-------------------------|---|--------------|---|---|---|---|---|-------------|
| Episode                 |               |             |               |   |             |   |   |                         |   |              |   |   |   |   |   |             |
| ASD                     | Y             | N           | Y             | N | N           | Y | N | Y<br>(Mini PAS-<br>ADD) | N | N            | Y | N | Y | N | N | <b>530</b>  |
| ADHD                    | Y<br>(K-SADS) | Y<br>(CAPA) | Y<br>(K-SADS) | Y | Y<br>(DICA) | N | Y | Y<br>(Mini PAS-<br>ADD) | Y | Y<br>(CDISC) | Y | Y | Y | Y | Y | <b>884</b>  |
| ODD                     | Y<br>(K-SADS) | Y<br>(CAPA) | Y<br>(K-SADS) | N | Y<br>(DICA) | N | Y | N                       | Y | Y<br>(CDISC) | Y | Y | Y | Y | Y | <b>744</b>  |
| CD                      | Y<br>(K-SADS) | Y<br>(CAPA) | Y<br>(K-SADS) | N | Y<br>(DICA) | N | Y | N                       | N | N            | Y | Y | Y | Y | Y | <b>634</b>  |
| Eating Disorder         | Y             | Y<br>(SCAN) | Y             | N | Y           | N | Y | Y<br>(MINI)             | N | Y<br>(SCID)  | Y | N | Y | Y | Y | <b>898</b>  |
| Substance Abuse         | Y             | Y           | Y             | Y | Y<br>(SCID) | N | Y | Y<br>(MINI)             | N | Y<br>(SCID)  | Y | Y | N | Y | Y | <b>1051</b> |
| Substance<br>Dependence | Y             | Y           | Y             | Y | Y<br>(SCID) | N | Y | Y<br>(MINI)             | N | Y<br>(SCID)  | Y | Y | N | Y | Y | <b>1051</b> |

Y = diagnosis assessed; N = diagnosis not assessed; SCAN = Schedules for Clinical Assessment in Neuropsychiatry; CAPA = The Child and Adolescent Psychiatric Assessment; K-SADS = Kiddie-Sads; DICA = Diagnostic Interview for Children and Adolescents; SCID = Structured Clinical Interview for DSM-IV axis I disorders; Mini PAS-ADD = Psychiatric Assessment Schedules for Adults with Developmental Disabilities; MINI = Mini International Neuropsychiatric Interview; CDISC = Computerized Diagnostic Interview Schedule for Children  
NOS = not otherwise specified; PTSD = post-traumatic stress disorder; OCD = obsessive-compulsive disorder; GAD = generalized anxiety disorder; ASD = autism spectrum disorder; ADHD = attention deficit hyperactivity disorder; ODD = oppositional defiant disorder; CD = conduct disorder
